# Supplementary material for: Effect of Covalent Organic Frameworks Containing Different Groups on Properties of Sulfonated Poly(ether ether ketone) Matrix Proton Exchange Membranes
Source: MDPI journal article supplement (doi:10.3390/nano12193518), 2022-10-08
Supplement: s1 [file s1]

# Effect of Covalent Organic Frameworks Containing Different Groups on Properties of Sulfonated Poly (Ether Ether Ketone) Matrix Proton Exchange Membranes

Xiaoyu Meng <sup>1,2,\*</sup>, Yinan Lv <sup>1</sup>, Lei Ding <sup>3</sup>, Luman Peng <sup>1</sup>, Qiwang Peng <sup>1</sup>, Chuanbo Cong <sup>1,2</sup>, Haimu Ye <sup>1,2</sup> and Qiong Zhou <sup>1,2</sup>

<sup>1</sup> Department of Materials Science and Engineering, College of New Energy and Materials, China University of Petroleum, Beijing 102249, China

<sup>2</sup> Beijing Key Laboratory of Failure, Corrosion, and Protection of Oil/Gas Facilities, China University of Petroleum, Beijing 102249, China

<sup>3</sup> CSSC Systems Engineering Research Institute, Beijing 100036, China

\* Correspondence: mengxy@cup.edu.cn

**Table. S1. Amount of raw materials required for preparing SPEEK/TpPa-SO<sub>3</sub>H composite membranes**

| COFs mass           |        |                          |          | 20 wt%             |
|---------------------|--------|--------------------------|----------|--------------------|
| percentage<br>(wt%) | Tp (g) | Pa-SO <sub>3</sub> H (g) | PTSA (g) | SPEEK solution (g) |
| 5                   | 0.0070 | 0.0094                   | 0.0430   | 1.6380             |
| 10                  | 0.0140 | 0.0188                   | 0.0860   | 1.6380             |
| 15                  | 0.0210 | 0.0282                   | 0.1290   | 1.6380             |
| 20                  | 0.0280 | 0.0376                   | 0.1720   | 1.6380             |
| 25                  | 0.0350 | 0.0470                   | 0.2150   | 1.6380             |

**Table. S2. Amount of raw materials required for preparing SPEEK/TpPa-Py composite membranes**

| COFs mass           |        |           |          | 20 wt%                  |
|---------------------|--------|-----------|----------|-------------------------|
| percentage<br>(wt%) | Tp (g) | Pa-Py (g) | PTSA (g) | SPEEK solu-<br>tion (g) |
| 5                   | 0.0092 | 0.0072    | 0.0430   | 1.6380                  |
| 10                  | 0.0184 | 0.0144    | 0.0860   | 1.6380                  |
| 15                  | 0.0276 | 0.0216    | 0.1290   | 1.6380                  |
| 20                  | 0.0368 | 0.0288    | 0.1720   | 1.6380                  |
| 25                  | 0.0460 | 0.0360    | 0.2150   | 1.6380                  |

**Table. S3. Amount of raw materials required for preparing SPEEK/TpPa-(SO<sub>3</sub>H-Py) composite membranes**

| COFs mass           |        |                          |           |          | 20 wt%                  |
|---------------------|--------|--------------------------|-----------|----------|-------------------------|
| percentage<br>(wt%) | Tp (g) | Pa-SO <sub>3</sub> H (g) | Pa-Py (g) | PTSA (g) | SPEEK so-<br>lution (g) |
| 20                  | 0.0316 | 0.0213                   | 0.0214    | 0.1720   | 1.6380                  |

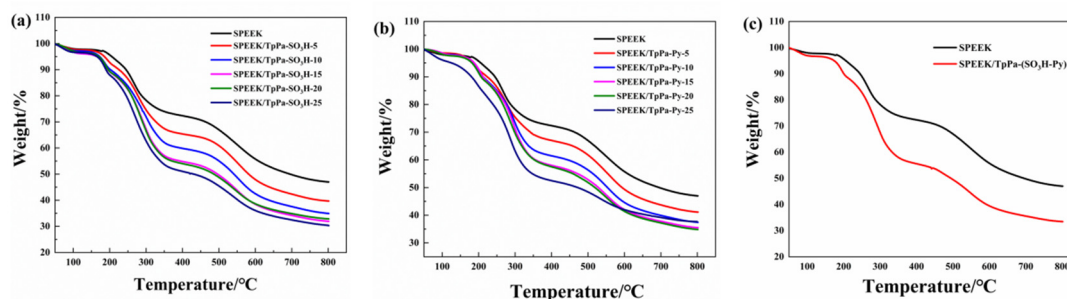**Figure S1. TGA of membranes: (a) SPEEK and SPEEK/TpPa-SO<sub>3</sub>H, (b) SPEEK and SPEEK/TpPa-Py, (c) SPEEK and SPEEK/TpPa-(SO<sub>3</sub>H-Py).**

The thermal stability of SPEEK, SPEEK/TpPa-SO<sub>3</sub>H, SPEEK/TpPa-Py, and SPEEK/TpPa-(SO<sub>3</sub>H-Py) composite membranes were determined by TGA. SPEEK showed different degradation stages at 50-200°C, 200-450°C and 450-800°C. When the temperature is in the range of 50-200°C, the mass loss of SPEEK is due to the loss of water bound by physical or chemical action. The degradation of SPEEK in the temperature range of 200-450°C is mainly due to the decomposition of -SO<sub>3</sub>H, and may also be accompanied by the thermal decomposition of phenol caused by random chain fracture[1]. When the temperature is above 450°C, the main chain of SPEEK breaks and pyrolysis occurs. Compared with SPEEK membranes, the mass loss of SPEEK/TpPa-SO<sub>3</sub>H, SPEEK/TpPa-Py, and SPEEK/TpPa-(SO<sub>3</sub>H-Py) composite membranes before 200°C includes a large amount of proton carrier PTSA loaded in TpPa-SO<sub>3</sub>H, TpPa-Py, and TpPa-(SO<sub>3</sub>H-Py) channels. In the temperature range of 200-450°C, the mass loss of SPEEK/TpPa-SO<sub>3</sub>H and SPEEK/TpPa-(SO<sub>3</sub>H-Py) composite membrane includes not only the -SO<sub>3</sub>H group in SPEEK matrix, but also the -SO<sub>3</sub>H group in TpPa-SO<sub>3</sub>H skeleton structure. The weight loss in the range of 450-800 °C is caused by the fracture of SPEEK polymer chain and the decomposition of COFs skeleton. Therefore, compared with SPEEK membranes, the quality of thermogravimetric curves of SPEEK/TpPa-SO<sub>3</sub>H, SPEEK/TpPa-Py, and SPEEK/TpPa-(SO<sub>3</sub>H-Py) composite membranes decreased significantly.

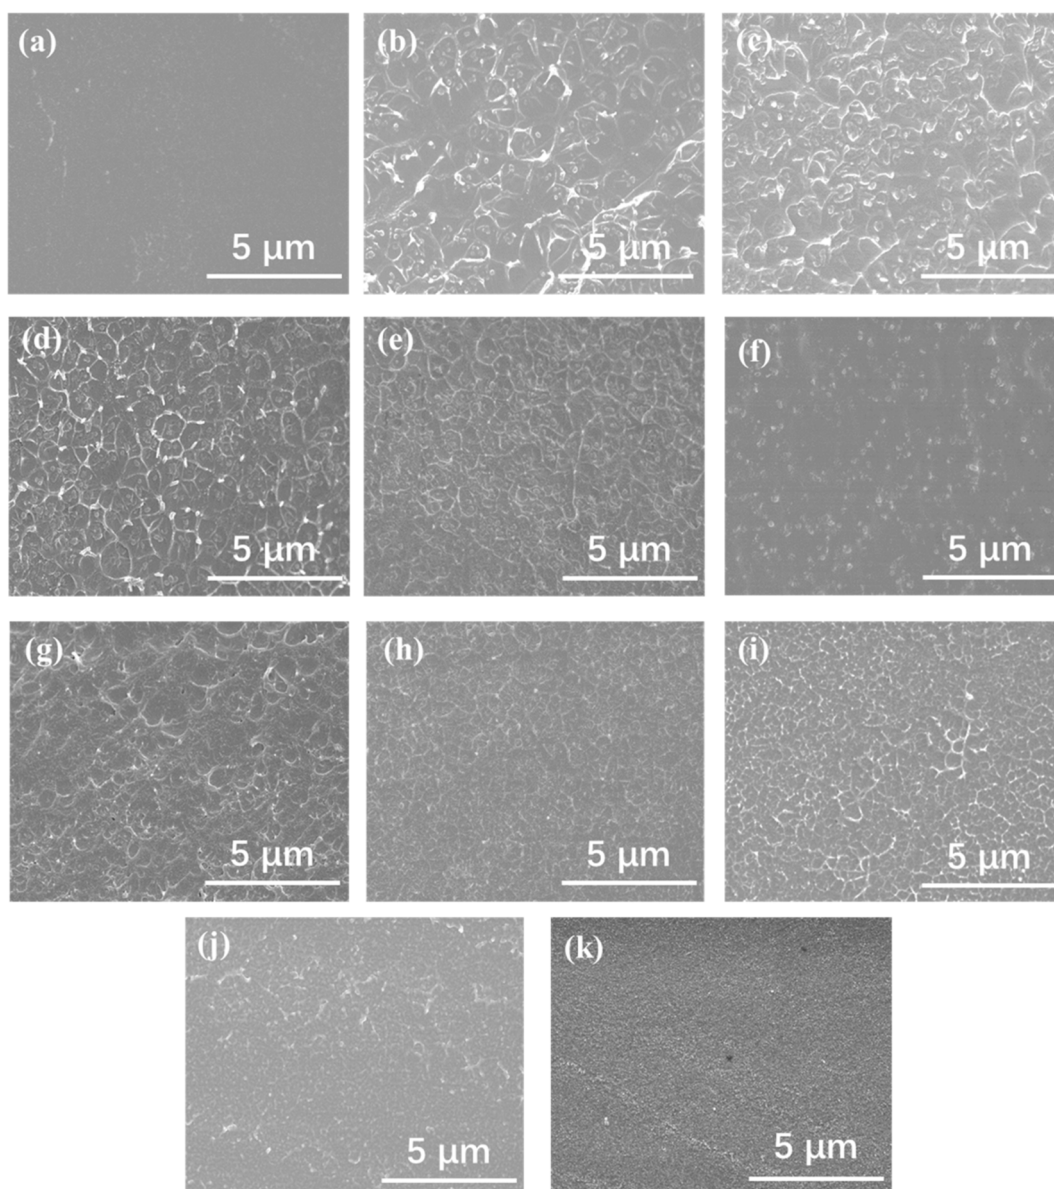

**Figure S2. SEM cross-section images of (a)SPEEK, (b)SPEEK/TpPa-SO<sub>3</sub>H-5, (c)SPEEK/TpPa-SO<sub>3</sub>H-10, (d)SPEEK/TpPa-SO<sub>3</sub>H-15, (e)SPEEK/TpPa-SO<sub>3</sub>H-20, (f)SPEEK/TpPa-SO<sub>3</sub>H-25, (g)SPEEK/TpPa-Py-5, (h)SPEEK/TpPa-Py-10, (i)SPEEK/TpPa-Py-15, (j) SPEEK/TpPa-Py-20, (k) SPEEK/TpPa-Py-25.**

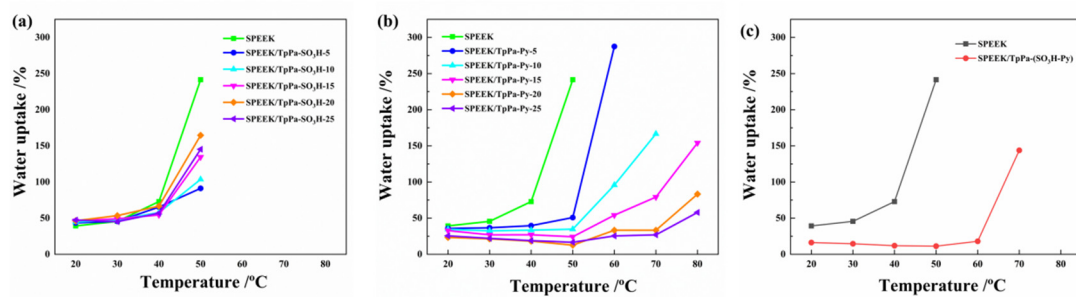

**Figure S3. Water uptaking of membranes: (a) SPEEK and SPEEK/TpPa-SO<sub>3</sub>H, (b) SPEEK and SPEEK/TpPa-Py, (c) SPEEK and SPEEK/TpPa-(SO<sub>3</sub>H-Py).**

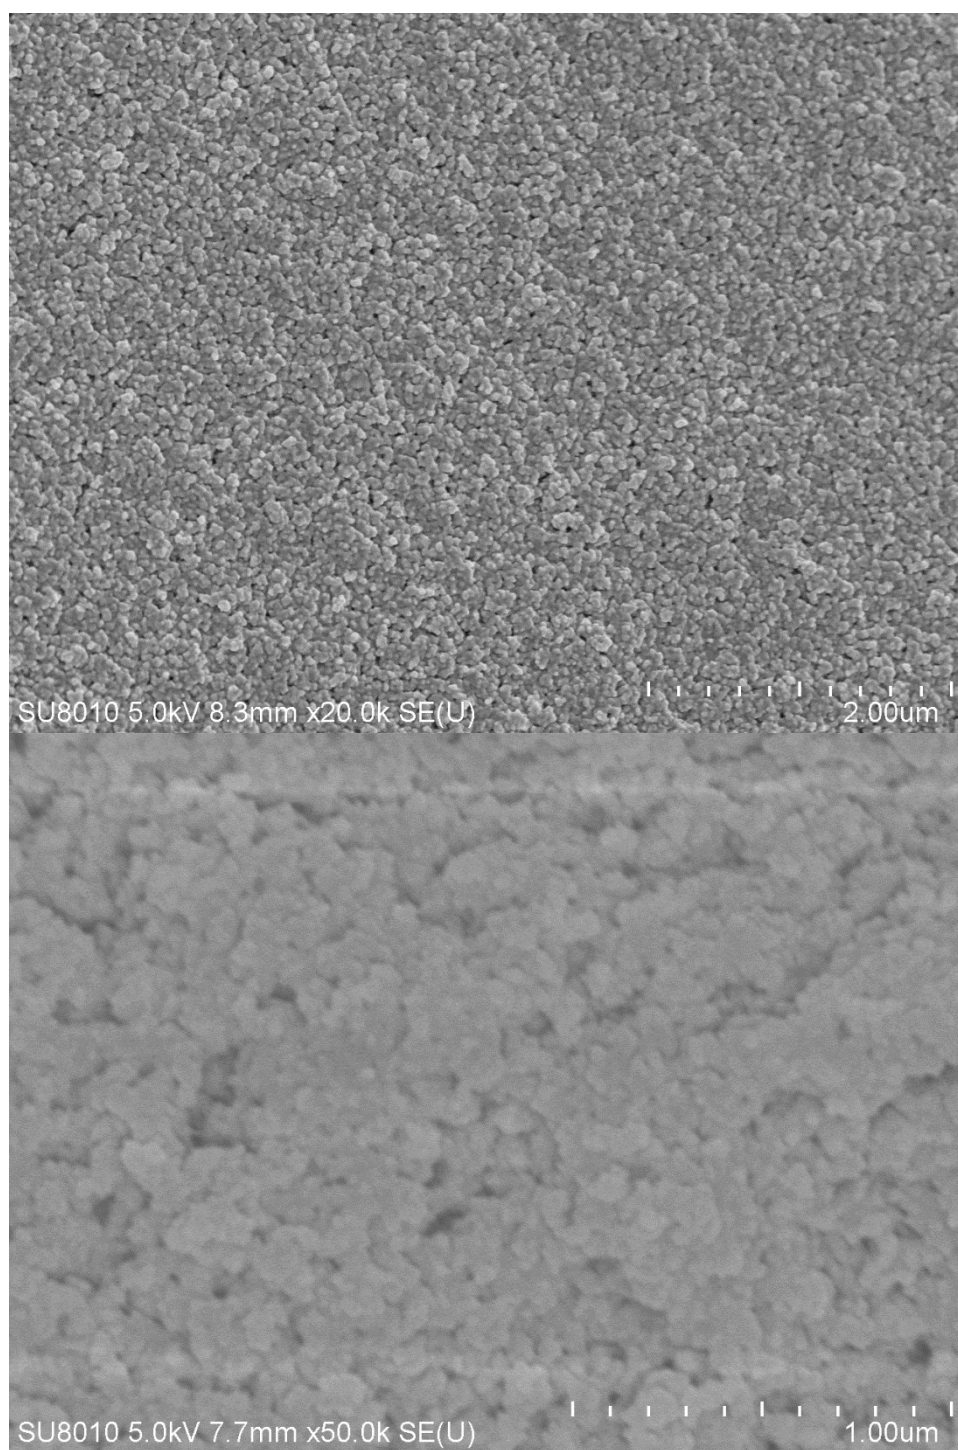

**Figure S4. SEM images of TpPa-(SO<sub>3</sub>H-Py) ( $\times 20000$ , and  $\times 50000$ ).**

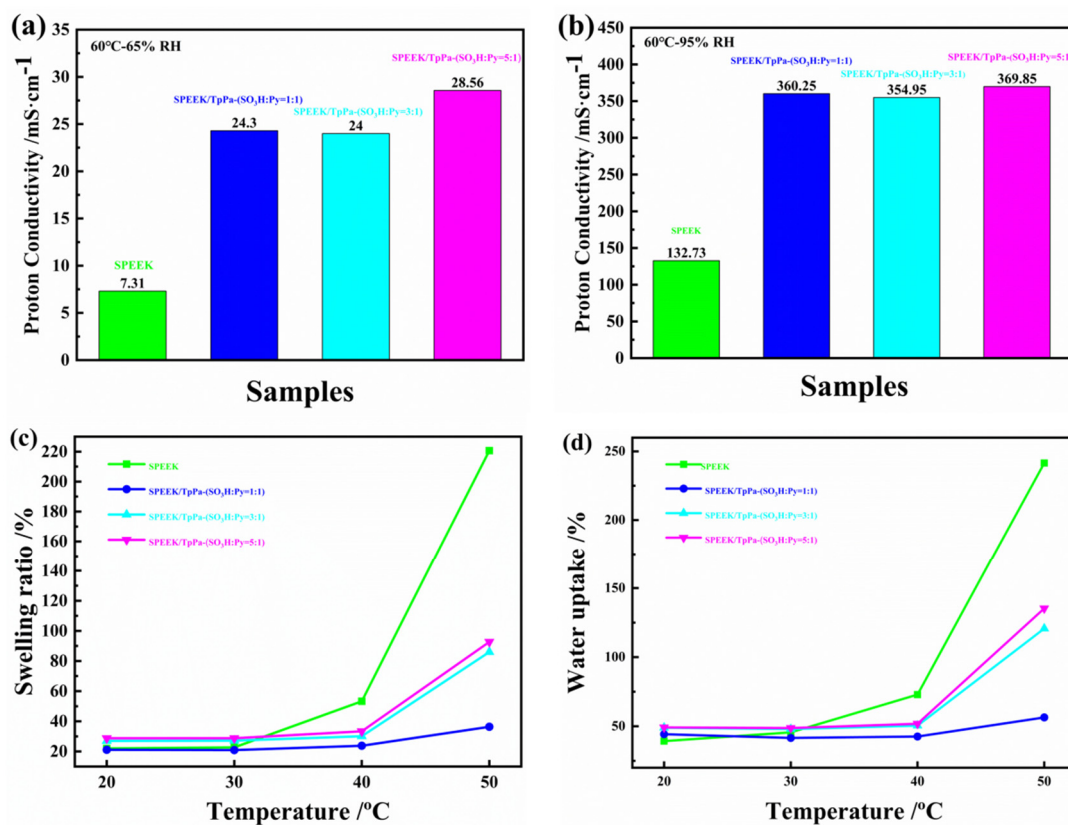

**Figure S5. Properties of composite membranes with different ratios of sulfonic acid groups to pyridine groups: (a) proton conductivity at 60°C and 65% RH, (b) proton conductivity at 60°C and 95% RH, (c) swelling ratio, and (d) water uptaking.**

## References

- [1] Lakshmi, R. M.; Choudhary, V.; Varma, I., Sulphonated poly (ether ether ketone): Synthesis and characterisation. *Journal of materials science* **2005**, *40* (3), 629-636.  
<https://doi.org/10.1007/s10853-005-6300-2>.
